# Supplementary material for: A global assessment of the male predominance in esophageal adenocarcinoma
Source: PubMed Central journal article supplement (PMC5122437; doi:10.18632/oncotarget.9113), 2016-04-29
Supplement: oncotarget-07-38876-s001.pdf [file oncotarget-07-38876-s001.pdf]

## A global assessment of the male predominance in esophageal adenocarcinoma

### Supplementary Materials

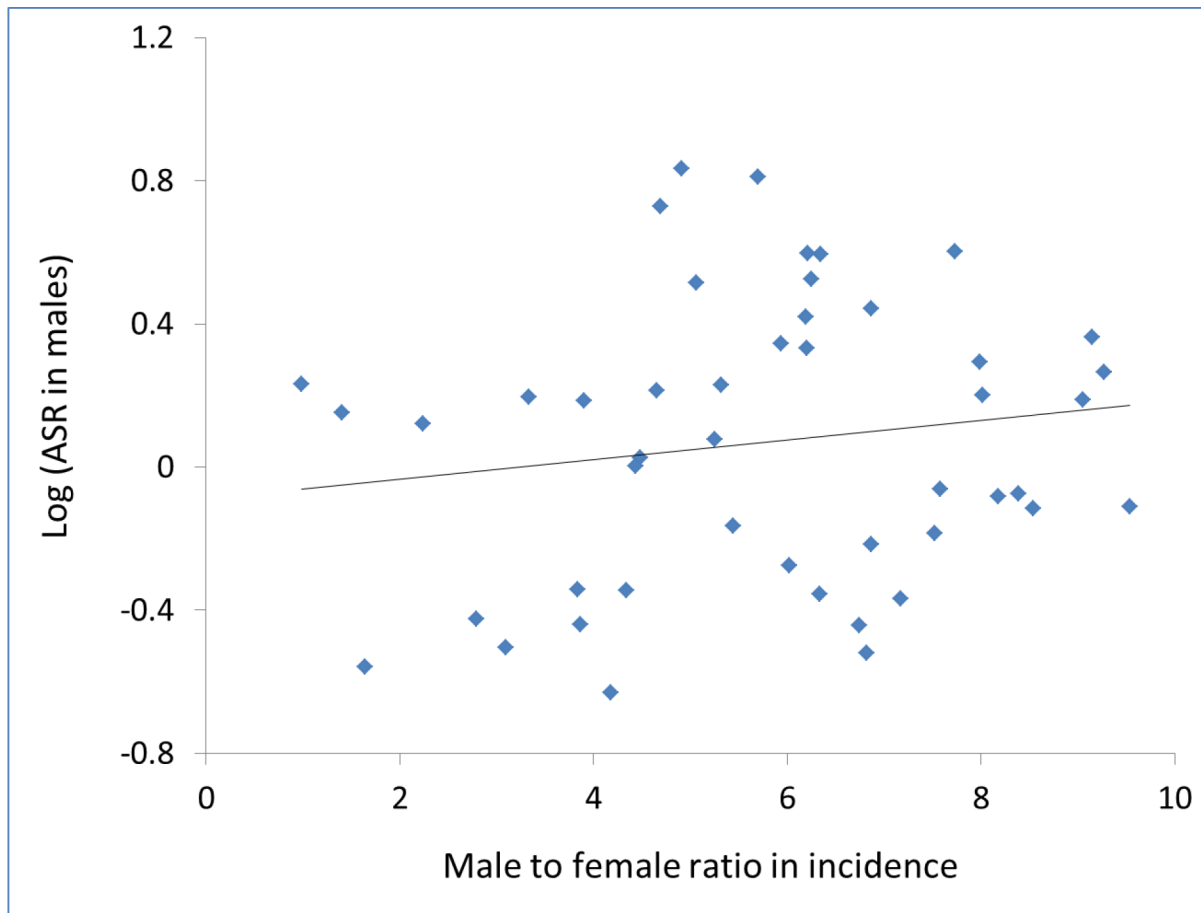

**Supplementary Figure S1: Scatter plot of the male-to-female ratio in the age-standardized incidence rates of esophageal adenocarcinoma against the logarithm of age-standardized incidence rates in males in selected countries during the period 2003–2007.**

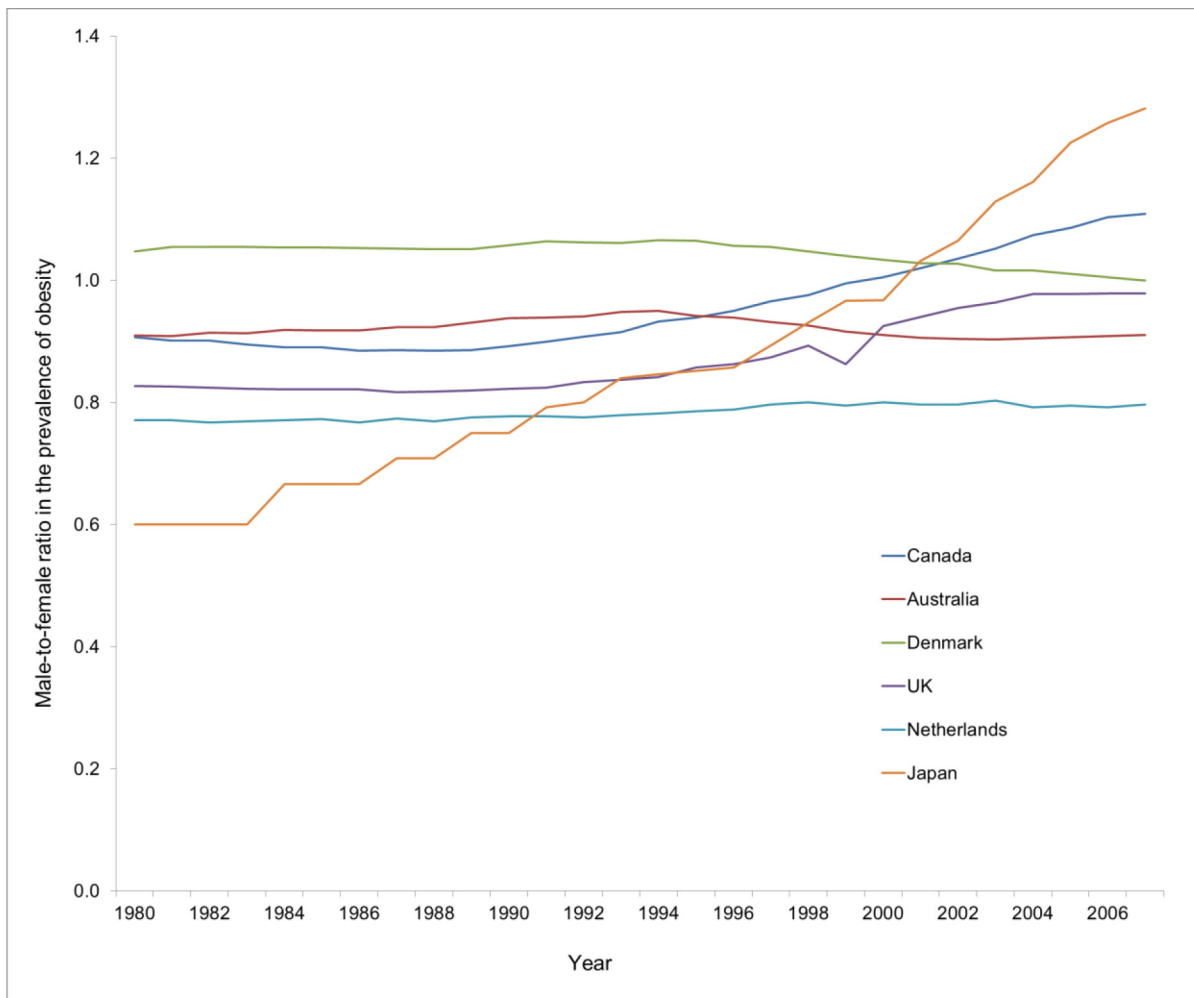

**Supplementary Figure S2: The male-to-female ratios in the age-standardized prevalence of obesity (body mass index  $\geq 30$ ) among adults in selected countries during the period 1980–2007.** Data source: Institute for Health Metrics and Evaluation (IHME). *Overweight and Obesity Viz.* Seattle, WA: IHME, University of Washington, 2014. Available from <http://vizhub.healthdata.org/obesity>. (Accessed on 16 October 2015).

**Supplemental Table S1: Sex difference in the incidence of esophageal adenocarcinoma by country/region in cancer incidence in five continents volume X**

| Countries/<br>regions                              | No. of cases |         | Crude incidence rate (95% CI) <sup>a</sup> |                   | ASIR (95% CI) <sup>a</sup> |                   | RD (95% CI) <sup>a</sup> | RR (95% CI)        |
|----------------------------------------------------|--------------|---------|--------------------------------------------|-------------------|----------------------------|-------------------|--------------------------|--------------------|
|                                                    | Males        | Females | Males                                      | Females           | Males                      | Females           |                          |                    |
| South Africa                                       | 19           | 29      | 0.78 (0.47, 1.22)                          | 0.98 (0.66, 1.41) | 1.42 (0.85, 2.22)          | 1.01 (0.66, 1.49) | 0.41 (-0.35, 1.16)       | 1.40 (0.77, 2.55)  |
| Egypt                                              | 16           | 10      | 0.16 (0.09, 0.26)                          | 0.10 (0.05, 0.19) | 0.28 (0.15, 0.46)          | 0.17 (0.08, 0.31) | 0.11 (-0.07, 0.29)       | 1.64 (0.71, 3.78)  |
| <b>Africa</b>                                      | 35           | 39      | 0.28 (0.20, 0.39)                          | 0.31 (0.22, 0.42) | 0.50 (0.34, 0.69)          | 0.48 (0.34, 0.66) | 0.02 (-0.22, 0.25)       | 1.03 (0.64, 1.66)  |
| Argentina                                          | 119          | 36      | 1.58 (1.31, 1.89)                          | 0.45 (0.32, 0.62) | 1.63 (1.35, 1.95)          | 0.35 (0.24, 0.49) | 0.28 (-0.04, 0.60)       | 4.65 (3.18, 6.81)  |
| Brazil                                             | 436          | 165     | 1.15 (1.04, 1.26)                          | 0.39 (0.34, 0.46) | 1.53 (1.39, 1.69)          | 0.39 (0.33, 0.46) | 1.14 (0.98, 1.31)        | 3.90 (3.22, 4.72)  |
| Chile                                              | 24           | 13      | 1.03 (0.66, 1.53)                          | 0.58 (0.31, 1.00) | 1.32 (0.84, 1.96)          | 0.59 (0.31, 1.01) | 0.73 (0.11, 1.35)        | 2.24 (1.14, 4.41)  |
| Colombia                                           | 73           | 23      | 0.80 (0.63, 1.01)                          | 0.23 (0.15, 0.34) | 1.06 (0.83, 1.33)          | 0.24 (0.15, 0.36) | 0.82 (0.56, 1.09)        | 4.48 (2.77, 7.23)  |
| USA,<br>Puerto Rico                                | 145          | 39      | 1.54 (1.30, 1.82)                          | 0.38 (0.27, 0.52) | 1.19 (1.00, 1.41)          | 0.23 (0.16, 0.32) | 0.97 (0.75, 1.18)        | 5.25 (3.64, 7.57)  |
| Uruguay                                            | 93           | 42      | 1.94 (1.56, 2.37)                          | 0.82 (0.59, 1.10) | 1.56 (1.26, 1.92)          | 0.47 (0.33, 0.66) | 1.10 (0.74, 1.45)        | 3.33 (2.27, 4.89)  |
| <b>Latin<br/>America<br/>and the<br/>Caribbean</b> | 890          | 318     | 1.25 (1.17, 1.34)                          | 0.41 (0.37, 0.46) | 1.42 (1.32, 1.52)          | 0.36 (0.32, 0.40) | 1.06 (0.95, 1.16)        | 3.94 (3.45, 4.50)  |
| Canada                                             | 3027         | 560     | 3.79 (3.66, 3.93)                          | 0.69 (0.63, 0.75) | 2.76 (2.67, 2.87)          | 0.40 (0.37, 0.44) | 2.36 (2.26, 2.47)        | 6.87 (6.25, 7.55)  |
| USA,NPCR<br>(42 states)                            | 32741        | 5565    | 5.04 (4.99, 5.10)                          | 0.83 (0.81, 0.85) | 4.01 (3.96, 4.05)          | 0.52 (0.50, 0.53) | 3.49 (3.44, 3.54)        | 7.73 (7.51, 7.97)  |
| <b>Northern<br/>America</b>                        | 35768        | 6125    | 4.91 (4.85, 4.96)                          | 0.82 (0.80, 0.84) | 3.86 (3.82, 3.90)          | 0.50 (0.49, 0.52) | 3.36 (3.31, 3.40)        | 7.64 (7.43, 7.86)  |
| Mainland<br>China                                  | 301          | 87      | 0.63 (0.56, 0.71)                          | 0.19 (0.15, 0.23) | 0.46 (0.40, 0.51)          | 0.12 (0.09, 0.15) | 0.34 (0.28, 0.39)        | 3.83 (3.01, 4.88)  |
| Hong Kong                                          | 71           | 30      | 0.43 (0.34, 0.55)                          | 0.17 (0.11, 0.24) | 0.31 (0.24, 0.40)          | 0.10 (0.07, 0.15) | 0.21 (0.13, 0.29)        | 3.10 (1.98, 4.84)  |
| India                                              | 265          | 96      | 0.23 (0.20, 0.25)                          | 0.10 (0.08, 0.12) | 0.38 (0.33, 0.43)          | 0.14 (0.11, 0.17) | 0.24 (0.19, 0.30)        | 2.79 (2.19, 3.55)  |
| Iran                                               | 25           | 21      | 1.01 (0.65, 1.49)                          | 0.86 (0.53, 1.32) | 1.70 (1.10, 2.52)          | 1.74 (1.04, 2.68) | -0.03 (-1.07, 1.00)      | 0.98 (0.54, 1.79)  |
| Israel                                             | 169          | 53      | 1.03 (0.88, 1.20)                          | 0.32 (0.24, 0.41) | 1.00 (0.86, 1.17)          | 0.23 (0.17, 0.30) | 0.78 (0.61, 0.94)        | 4.44 (3.22, 6.10)  |
| Japan                                              | 373          | 79      | 0.79 (0.71, 0.87)                          | 0.16 (0.12, 0.20) | 0.43 (0.38, 0.48)          | 0.06 (0.05, 0.08) | 0.37 (0.32, 0.42)        | 7.17 (5.50, 9.35)  |
| Republic of<br>Korea                               | 312          | 67      | 0.26 (0.23, 0.29)                          | 0.06 (0.04, 0.07) | 0.30 (0.27, 0.34)          | 0.04 (0.03, 0.06) | 0.26 (0.22, 0.29)        | 6.82 (5.23, 8.91)  |
| Philippines                                        | 59           | 18      | 0.19 (0.15, 0.25)                          | 0.06 (0.03, 0.09) | 0.45 (0.33, 0.60)          | 0.10 (0.06, 0.17) | 0.35 (0.21, 0.49)        | 4.34 (2.49, 7.57)  |
| Thailand                                           | 53           | 15      | 0.21 (0.16, 0.27)                          | 0.05 (0.03, 0.09) | 0.23 (0.17, 0.31)          | 0.06 (0.03, 0.09) | 0.18 (0.11, 0.25)        | 4.18 (2.34, 7.46)  |
| Turkey                                             | 70           | 13      | 0.47 (0.36, 0.59)                          | 0.09 (0.05, 0.15) | 0.53 (0.41, 0.67)          | 0.09 (0.05, 0.15) | 0.44 (0.31, 0.58)        | 6.02 (3.32, 10.91) |
| <b>Asia</b>                                        | 1698         | 479     | 0.39 (0.37, 0.40)                          | 0.11 (0.10, 0.12) | 0.41 (0.39, 0.42)          | 0.09 (0.08, 0.10) | 0.31 (0.29, 0.33)        | 4.37 (3.95, 4.84)  |
| Austria                                            | 468          | 81      | 2.34 (2.14, 2.57)                          | 0.38 (0.30, 0.48) | 1.59 (1.44, 1.74)          | 0.20 (0.15, 0.25) | 1.39 (1.24, 1.54)        | 8.02 (6.22, 10.33) |
| Belgium                                            | 1259         | 293     | 6.13 (5.80, 6.48)                          | 1.37 (1.22, 1.53) | 3.92 (3.70, 4.15)          | 0.62 (0.54, 0.70) | 3.30 (3.07, 3.54)        | 6.35 (5.54, 7.28)  |
| Bulgaria                                           | 127          | 30      | 0.68 (0.56, 0.80)                          | 0.15 (0.10, 0.21) | 0.44 (0.37, 0.53)          | 0.07 (0.05, 0.11) | 0.37 (0.29, 0.45)        | 6.34 (4.19, 9.58)  |
| Belarus                                            | 201          | 45      | 0.88 (0.76, 1.01)                          | 0.17 (0.13, 0.23) | 0.77 (0.66, 0.88)          | 0.09 (0.06, 0.12) | 0.68 (0.56, 0.79)        | 8.54 (6.07, 12.00) |
| Croatia                                            | 102          | 21      | 0.95 (0.78, 1.16)                          | 0.18 (0.11, 0.28) | 0.65 (0.53, 0.80)          | 0.09 (0.05, 0.14) | 0.57 (0.43, 0.70)        | 7.53 (4.53, 12.50) |
| Czech<br>Republic                                  | 649          | 98      | 2.60 (2.40, 2.80)                          | 0.37 (0.30, 0.46) | 1.84 (1.70, 2.00)          | 0.20 (0.16, 0.25) | 1.65 (1.50, 1.80)        | 9.27 (7.42, 11.58) |
| Denmark                                            | 687          | 175     | 5.12 (4.75, 5.52)                          | 1.28 (1.10, 1.48) | 3.27 (3.03, 3.53)          | 0.65 (0.55, 0.76) | 2.62 (2.36, 2.89)        | 5.06 (4.25, 6.03)  |
| Finland                                            | 335          | 96      | 2.61 (2.34, 2.90)                          | 0.72 (0.58, 0.87) | 1.69 (1.51, 1.89)          | 0.32 (0.25, 0.40) | 1.37 (1.18, 1.57)        | 5.32 (4.20, 6.75)  |
| France                                             | 721          | 117     | 3.54 (3.28, 3.81)                          | 0.55 (0.45, 0.65) | 2.30 (2.13, 2.48)          | 0.25 (0.20, 0.31) | 2.05 (1.87, 2.23)        | 9.15 (7.41, 11.3)  |
| Germany                                            | 1722         | 308     | 3.30 (3.14, 3.46)                          | 0.56 (0.50, 0.63) | 1.96 (1.87, 2.06)          | 0.25 (0.22, 0.28) | 1.72 (1.62, 1.82)        | 7.99 (7.00, 9.12)  |

|                    |              |             |                          |                          |                          |                          |                          |                          |
|--------------------|--------------|-------------|--------------------------|--------------------------|--------------------------|--------------------------|--------------------------|--------------------------|
| Ireland            | 647          | 176         | 6.26 (5.78, 6.76)        | 1.69 (1.45, 1.96)        | 5.36 (4.96, 5.79)        | 1.14 (0.97, 1.33)        | 4.22 (3.77, 4.67)        | 4.70 (3.95, 5.58)        |
| Italy              | 790          | 157         | 1.56 (1.45, 1.67)        | 0.29 (0.25, 0.34)        | 0.87 (0.80, 0.93)        | 0.11 (0.10, 0.14)        | 0.75 (0.69, 0.82)        | 7.58 (6.28, 9.15)        |
| Lithuania          | 78           | 16          | 0.98 (0.77, 1.22)        | 0.18 (0.10, 0.29)        | 0.78 (0.61, 0.97)        | 0.08 (0.05, 0.15)        | 0.69 (0.52, 0.87)        | 9.54 (5.45, 16.68)       |
| The Netherlands    | 3764         | 894         | 9.33 (9.03, 9.63)        | 2.17 (2.03, 2.32)        | 6.45 (6.25, 6.67)        | 1.13 (1.06, 1.21)        | 5.32 (5.10, 5.54)        | 5.70 (5.28, 6.15)        |
| Norway             | 374          | 92          | 3.26 (2.93, 3.60)        | 0.79 (0.64, 0.97)        | 2.21 (1.99, 2.45)        | 0.37 (0.29, 0.47)        | 1.84 (1.59, 2.08)        | 5.93 (4.63, 7.60)        |
| Poland             | 77           | 16          | 0.46 (0.36, 0.58)        | 0.09 (0.05, 0.15)        | 0.36 (0.28, 0.45)        | 0.05 (0.03, 0.09)        | 0.31 (0.22, 0.39)        | 6.74 (3.87, 11.76)       |
| Russian Federation | 88           | 36          | 0.86 (0.69, 1.05)        | 0.28 (0.20, 0.39)        | 0.69 (0.55, 0.85)        | 0.13 (0.09, 0.19)        | 0.56 (0.41, 0.71)        | 5.45 (3.64, 8.15)        |
| Slovakia           | 124          | 22          | 0.95 (0.79, 1.13)        | 0.16 (0.10, 0.24)        | 0.83 (0.69, 0.99)        | 0.10 (0.06, 0.16)        | 0.73 (0.57, 0.88)        | 8.18 (5.14, 13.01)       |
| Slovenia           | 58           | 10          | 1.18 (0.90, 1.53)        | 0.20 (0.09, 0.36)        | 0.84 (0.64, 1.10)        | 0.10 (0.05, 0.21)        | 0.74 (0.51, 0.97)        | 8.39 (4.11, 17.1)        |
| Spain              | 622          | 88          | 2.34 (2.16, 2.53)        | 0.33 (0.26, 0.40)        | 1.54 (1.42, 1.67)        | 0.17 (0.13, 0.22)        | 1.37 (1.24, 1.50)        | 9.05 (7.09, 11.55)       |
| Sweden             | 813          | 180         | 3.63 (3.38, 3.88)        | 0.79 (0.68, 0.91)        | 2.14 (2.00, 2.30)        | 0.35 (0.29, 0.41)        | 1.80 (1.64, 1.96)        | 6.20 (5.18, 7.42)        |
| Switzerland        | 440          | 103         | 4.18 (3.80, 4.59)        | 0.93 (0.76, 1.13)        | 2.62 (2.38, 2.89)        | 0.42 (0.34, 0.53)        | 2.20 (1.94, 2.46)        | 6.20 (4.93, 7.78)        |
| Ukraine            | 858          | 216         | 0.79 (0.74, 0.84)        | 0.17 (0.15, 0.19)        | 0.61 (0.57, 0.65)        | 0.09 (0.08, 0.10)        | 0.52 (0.48, 0.56)        | 6.86 (5.87, 8.03)        |
| UK                 | 15773        | 4536        | 10.69 (10.53, 10.86)     | 2.95 (2.87, 3.04)        | 6.82 (6.71, 6.93)        | 1.39 (1.34, 1.43)        | 5.43 (5.31, 5.55)        | 4.91 (4.74, 5.09)        |
| Serbia             | 76           | 22          | 0.58 (0.45, 0.72)        | 0.16 (0.10, 0.24)        | 0.36 (0.28, 0.46)        | 0.09 (0.06, 0.15)        | 0.27 (0.18, 0.36)        | 3.86 (2.37, 6.29)        |
| <b>Europe</b>      | <b>30853</b> | <b>7827</b> | <b>4.34 (4.29, 4.39)</b> | <b>1.03 (1.01, 1.05)</b> | <b>2.91 (2.87, 2.94)</b> | <b>0.48 (0.47, 0.49)</b> | <b>2.43 (2.39, 2.46)</b> | <b>6.04 (5.88, 6.20)</b> |
|                    |              |             |                          |                          |                          |                          |                          |                          |
| Australia          | 2303         | 470         | 4.62 (4.43, 4.81)        | 0.93 (0.85, 1.02)        | 3.35 (3.21, 3.49)        | 0.54 (0.49, 0.59)        | 2.81 (2.66, 2.96)        | 6.25 (5.63, 6.93)        |
| New Zealand        | 522          | 108         | 5.16 (4.73, 5.63)        | 1.03 (0.85, 1.24)        | 3.95 (3.61, 4.30)        | 0.64 (0.52, 0.78)        | 3.31 (2.95, 3.67)        | 6.21 (5.00, 7.70)        |
| <b>Oceania</b>     | <b>2825</b>  | <b>578</b>  | <b>4.71 (4.54, 4.89)</b> | <b>0.95 (0.87, 1.03)</b> | <b>3.44 (3.32, 3.57)</b> | <b>0.55 (0.51, 0.60)</b> | <b>2.89 (2.75, 3.03)</b> | <b>6.24 (5.68, 6.85)</b> |

ASIR: age-standardized incidence rate using the World Health Organization (WHO) World Standard Population 2000 as the reference; CI: confidence interval; NPCR: National Program of Cancer Registries; RD: risk difference; RR: relative risk measured by the male-to-female ratio in the age-standardized incidence rate.

<sup>a</sup>In 1/100,000 person-years.

**Supplemental Table S2: Time trends of the sex difference in the incidence of esophageal adenocarcinoma in selected populations**

| Population               | Period    | RD (95% CI) <sup>a</sup> | RR (95% CI)        |
|--------------------------|-----------|--------------------------|--------------------|
| Canada                   | 1978–1982 | 0.62 (0.41, 0.83)        | 6.24 (3.32, 11.74) |
|                          | 1983–1987 | 1.01 (0.75, 1.27)        | 5.64 (3.58, 8.88)  |
|                          | 1988–1992 | 1.28 (1.18, 1.37)        | 6.80 (5.87, 7.87)  |
|                          | 1993–1997 | 1.74 (1.64, 1.84)        | 7.27 (6.43, 8.23)  |
|                          | 1998–2002 | 2.29 (2.17, 2.42)        | 8.09 (7.13, 9.18)  |
|                          | 2003–2007 | 2.36 (2.26, 2.47)        | 6.87 (6.25, 7.55)  |
| USA, Whites <sup>b</sup> | 1978–1982 | 0.78 (0.69, 0.88)        | 6.64 (5.23, 8.43)  |
|                          | 1983–1987 | 1.38 (1.26, 1.49)        | 9.34 (7.66, 11.38) |
|                          | 1988–1992 | 2.11 (1.98, 2.25)        | 9.22 (7.88, 10.78) |
|                          | 1993–1997 | 2.67 (2.51, 2.82)        | 7.84 (6.89, 8.91)  |
|                          | 1998–2002 | 3.47 (3.30, 3.64)        | 8.43 (7.53, 9.44)  |
|                          | 2003–2007 | 3.71 (3.55, 3.88)        | 7.72 (6.97, 8.54)  |
| USA, Blacks <sup>b</sup> | 1988–1992 | 0.35 (0.11, 0.59)        | 2.93 (1.42, 6.01)  |
|                          | 1993–1997 | 0.53 (0.28, 0.78)        | 4.28 (2.21, 8.28)  |
|                          | 1998–2002 | 0.51 (0.27, 0.75)        | 3.74 (2.03, 6.89)  |
|                          | 2003–2007 | 0.51 (0.29, 0.73)        | 3.73 (2.19, 6.36)  |
| Australia                | 1978–1982 | 1.06 (0.68, 1.43)        | 4.98 (2.79, 8.90)  |
|                          | 1983–1987 | 1.07 (0.95, 1.19)        | 5.21 (4.31, 6.29)  |
|                          | 1988–1992 | 1.59 (1.44, 1.74)        | 5.57 (4.72, 6.57)  |
|                          | 1993–1997 | 2.18 (2.03, 2.32)        | 6.14 (5.40, 6.99)  |
|                          | 1998–2002 | 2.51 (2.36, 2.65)        | 6.50 (5.78, 7.31)  |
|                          | 2003–2007 | 2.81 (2.66, 2.96)        | 6.25 (5.63, 6.93)  |
| Sweden                   | 1988–1992 | 0.60 (0.50, 0.70)        | 5.61 (4.25, 7.41)  |
|                          | 1993–1997 | 0.87 (0.75, 0.98)        | 5.77 (4.49, 7.40)  |
|                          | 1998–2002 | 1.45 (1.30, 1.60)        | 5.83 (4.79, 7.09)  |
|                          | 2003–2007 | 1.80 (1.64, 1.96)        | 6.20 (5.18, 7.42)  |
| Finland                  | 1988–1992 | 0.52 (0.39, 0.65)        | 4.71 (3.19, 6.94)  |
|                          | 1993–1997 | 0.84 (0.68, 1.01)        | 5.65 (4.03, 7.91)  |
|                          | 1998–2002 | 1.13 (0.95, 1.31)        | 6.15 (4.59, 8.25)  |
|                          | 2003–2007 | 1.37 (1.18, 1.57)        | 5.32 (4.20, 6.75)  |
| Norway                   | 1988–1992 | 0.73 (0.57, 0.90)        | 6.01 (3.96, 9.12)  |
|                          | 1993–1997 | 0.99 (0.81, 1.17)        | 7.43 (5.07, 10.88) |
|                          | 1998–2002 | 1.22 (1.00, 1.43)        | 4.32 (3.30, 5.66)  |
|                          | 2003–2007 | 1.84 (1.59, 2.08)        | 5.93 (4.63, 7.60)  |
| Denmark                  | 1978–1982 | 0.64 (0.48, 0.80)        | 3.42 (2.52, 4.65)  |
|                          | 1983–1987 | 1.18 (1.00, 1.38)        | 5.08 (3.88, 6.64)  |

|             |           |                   |                     |
|-------------|-----------|-------------------|---------------------|
|             | 1988–1992 | 1.86 (1.64, 2.10) | 5.49 (4.39, 6.88)   |
|             | 1993–1997 | 2.42 (2.17, 2.68) | 6.49 (5.26, 8.01)   |
|             | 1998–2002 | 2.58 (2.32, 2.85) | 5.48 (4.54, 6.62)   |
|             | 2003–2007 | 2.62 (2.37, 2.89) | 5.06 (4.25, 6.03)   |
| UK          | 1978–1982 | 1.57 (1.44, 1.70) | 3.73 (3.36, 4.14)   |
|             | 1983–1987 | 2.15 (2.03, 2.27) | 4.37 (4.04, 4.73)   |
|             | 1988–1992 | 2.50 (2.39, 2.62) | 4.28 (4.02, 4.57)   |
|             | 1993–1997 | 3.85 (3.74, 3.96) | 4.55 (4.36, 4.75)   |
|             | 1998–2002 | 4.72 (4.60, 4.83) | 4.77 (4.59, 4.96)   |
|             | 2003–2007 | 5.43 (5.31, 5.55) | 4.91 (4.74, 5.09)   |
| Ireland     | 1988–1992 | 1.48 (0.71, 2.24) | 4.06 (2.02, 8.14)   |
|             | 1993–1997 | 2.91 (2.43, 3.40) | 3.90 (3.09, 4.92)   |
|             | 1998–2002 | 3.61 (3.18, 4.05) | 4.88 (4.00, 5.95)   |
|             | 2003–2007 | 4.22 (3.77, 4.67) | 4.70 (3.95, 5.58)   |
| Netherlands | 1988–1992 | 1.93 (1.75, 2.11) | 3.87 (3.41, 4.39)   |
|             | 1993–1997 | 2.60 (2.42, 2.77) | 4.49 (4.05, 4.97)   |
|             | 1998–2002 | 3.85 (3.65, 4.05) | 4.99 (4.57, 5.44)   |
|             | 2003–2007 | 5.32 (5.10, 5.54) | 5.70 (5.28, 6.15)   |
| France      | 1983–1987 | 1.04 (0.82, 1.26) | 8.85 (5.49, 14.26)  |
|             | 1988–1992 | 1.05 (0.87, 1.23) | 6.75 (4.81, 9.47)   |
|             | 1993–1997 | 1.32 (1.14, 1.50) | 7.00 (5.30, 9.25)   |
|             | 1998–2002 | 1.88 (1.70, 2.06) | 10.31 (8.13, 13.07) |
|             | 2003–2007 | 2.05 (1.87, 2.23) | 9.15 (7.41, 11.30)  |
| Czech       | 1988–1992 | 0.65 (0.55, 0.76) | 8.11 (5.74, 11.47)  |
|             | 1993–1997 | 0.90 (0.79, 1.02) | 10.84 (7.73, 15.2)  |
|             | 1998–2002 | 1.16 (1.03, 1.29) | 9.79 (7.42, 12.92)  |
|             | 2003–2007 | 1.65 (1.50, 1.80) | 9.27 (7.42, 11.58)  |
| Slovak      | 1988–1992 | 0.48 (0.34, 0.62) | 6.50 (3.66, 11.54)  |
|             | 1993–1997 | 0.61 (0.46, 0.76) | 8.66 (5.04, 14.87)  |
|             | 1998–2002 | 0.69 (0.52, 0.85) | 5.27 (3.54, 7.86)   |
|             | 2003–2007 | 0.73 (0.57, 0.88) | 8.18 (5.14, 13.01)  |
| Switzerland | 1988–1992 | 0.94 (0.73, 1.15) | 4.83 (3.40, 6.87)   |
|             | 1993–1997 | 1.36 (1.10, 1.62) | 4.80 (3.55, 6.48)   |
|             | 1998–2002 | 2.41 (2.05, 2.77) | 8.56 (6.06, 12.10)  |
|             | 2003–2007 | 2.20 (1.94, 2.46) | 6.2 (4.93, 7.78)    |
| Spain       | 1988–1992 | 0.56 (0.45, 0.67) | 6.82 (4.49, 10.34)  |
|             | 1993–1997 | 0.65 (0.51, 0.78) | 6.44 (4.30, 9.64)   |

|           |           |                   |                    |
|-----------|-----------|-------------------|--------------------|
|           | 1998–2002 | 1.07 (0.94, 1.19) | 8.93 (6.61, 12.05) |
|           | 2003–2007 | 1.37 (1.24, 1.50) | 9.05 (7.09, 11.55) |
| Italy     | 1983–1987 | 0.42 (0.27, 0.57) | 6.92 (3.37, 14.18) |
|           | 1988–1992 | 0.58 (0.48, 0.69) | 8.20 (5.34, 12.59) |
|           | 1993–1997 | 0.60 (0.52, 0.69) | 6.85 (5.15, 9.11)  |
|           | 1998–2002 | 0.74 (0.66, 0.82) | 6.39 (5.17, 7.91)  |
|           | 2003–2007 | 0.75 (0.69, 0.82) | 7.58 (6.28, 9.15)  |
| India     | 1988–1992 | 0.45 (0.34, 0.56) | 4.10 (2.83, 5.93)  |
|           | 1993–1997 | 0.29 (0.22, 0.36) | 2.56 (2.00, 3.26)  |
|           | 1998–2002 | 0.30 (0.22, 0.37) | 2.57 (2.00, 3.30)  |
|           | 2003–2007 | 0.24 (0.19, 0.30) | 2.79 (2.19, 3.55)  |
| Japan     | 1978–1982 | 0.18 (0.11, 0.24) | 3.38 (2.12, 5.37)  |
|           | 1983–1987 | 0.22 (0.15, 0.30) | 4.06 (2.48, 6.63)  |
|           | 1988–1992 | 0.26 (0.21, 0.32) | 6.89 (4.46, 10.62) |
|           | 1993–1997 | 0.37 (0.31, 0.42) | 8.05 (5.72, 11.35) |
|           | 1998–2002 | 0.33 (0.28, 0.39) | 7.60 (5.48, 10.54) |
|           | 2003–2007 | 0.37 (0.32, 0.42) | 7.17 (5.50, 9.35)  |
| Hong Kong | 1988–1992 | 0.81 (0.58, 1.03) | 2.75 (2.08, 3.62)  |
|           | 1993–1997 | 0.62 (0.45, 0.79) | 3.13 (2.28, 4.31)  |
|           | 1998–2002 | 0.39 (0.28, 0.51) | 4.13 (2.70, 6.32)  |
|           | 2003–2007 | 0.21 (0.13, 0.29) | 3.10 (1.98, 4.84)  |

CI: confidence interval; RD: risk difference; RR: relative risk measured by the male-to-female ratio in the age-standardized incidence rate using the World Health Organization (WHO) World Standard Population 2000 as the reference; UK: the United Kingdom; USA: the United States of America.

<sup>a</sup>In 1/100,000 person-years

<sup>b</sup>Surveillance, Epidemiology, and End Results Program (9 registries).
